# Supplementary material for: A highly efficient and robust Cu/SiO2 catalyst prepared by the ammonia evaporation hydrothermal method for glycerol hydrogenolysis to 1,2-propanediol
Source: Royal Society of Chemistry journal article supplement (doi:10.1039/c4cy01148a), 2014-10-30
Supplement: c4cy01148a1.pdf [file c4cy01148a1.pdf]

**Supplementary Information for**

**Highly efficient and robust Cu/SiO<sub>2</sub> catalyst prepared by ammonia  
evaporation hydrothermal method for glycerol hydrogenolysis to 1,2-  
propanediol**

Shanhui Zhu,<sup>a,\*</sup> Xiaoqing Gao,<sup>b</sup> Yulei Zhu,<sup>a,b,\*</sup> Weibin Fan,<sup>a</sup> Jianguo Wang,<sup>a</sup> and  
Yongwang Li<sup>a,b</sup>

<sup>a</sup>*State Key Laboratory of Coal Conversion, Institute of Coal Chemistry, Chinese  
Academy of Sciences, Taiyuan 030001, PR China*

<sup>b</sup>*Synfuels China Co. Ltd., Taiyuan 030032, PR China*

**Table S1** Comparison for Cu/SiO<sub>2</sub> catalysts prepared by different preparation methods in glycerol hydrogenolysis to 1,2-PDO.

| Preparation methods                     | Operation  | T (°C) | P (MPa) | Conversion (%) | Selectivity (%) | Stability                 | Reference |
|-----------------------------------------|------------|--------|---------|----------------|-----------------|---------------------------|-----------|
| Ion exchange                            | continuous | 245    | 1.5     | 92             | 86              | -                         | 1         |
| Impregnation                            | batch      | 240    | 8       | 10             | 83.6            | deactivation              | 2         |
| Homogeneous deposition-precipitation    | batch      | 180    | 9       | 22.1           | 98.0            | deactivation              | 3         |
| Heterogeneous deposition-precipitation  | batch      | 180    | 9       | 35.0           | 93.7            | deactivation              | 3         |
| Precipitation-gel                       | batch      | 180    | 9       | 73.4           | 94.3            | 200 h <sup>a</sup>        | 4         |
| Precipitation-gel <sup>b</sup>          | batch      | 200    | 8       | 73.3           | 92.2            | deactivation <sup>a</sup> | 5         |
| Precipitation-gel                       | continuous | 200    | 5       | 62.1           | 89.5            | deactivation <sup>c</sup> | 6         |
| Ammonia evaporation hydrothermal method | continuous | 200    | 5       | 100            | 98.3            | 300 h                     | this work |

<sup>a</sup> Performed in fixed-bed reactor; solvent was 10 wt% water and 50 wt% methanol.

<sup>b</sup> Cu/SiO<sub>2</sub> calcined at 450 °C

<sup>c</sup> 90 wt% water as solvent.

The catalytic performances of Cu/SiO<sub>2</sub> catalysts with different preparation methods are summarized in [Table S1](#). Compared to previous catalysts, the AEH method presented higher glycerol conversion and 1,2-PDO selectivity. Notably, most of the previous Cu/SiO<sub>2</sub> catalysts (except precipitation-gel method) deactivated rapidly due to the serious agglomeration of copper nanoparticles. The Cu/SiO<sub>2</sub> prepared by precipitation-gel method stabilized 200 h, while our AEH presented 300 h long-term

performance.<sup>4</sup> The above results indicated that AEH method was highly efficient for fabricating active, selective and robust Cu-based catalyst for glycerol hydrogenolysis to 1,2-PDO.

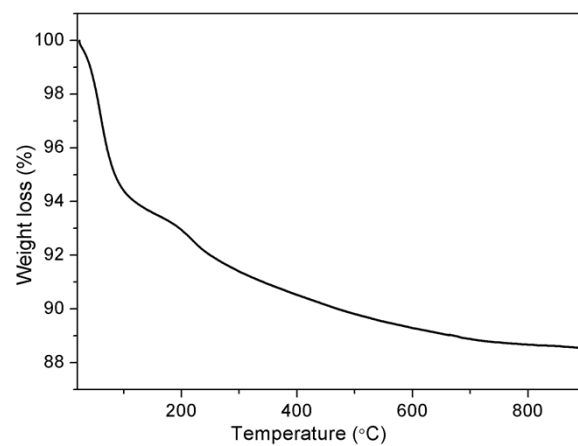

**Fig. S1** Thermogravimetric analysis in oxidative atmosphere of the spent 25Cu/SiO<sub>2</sub>-IM catalyst during long-term test.

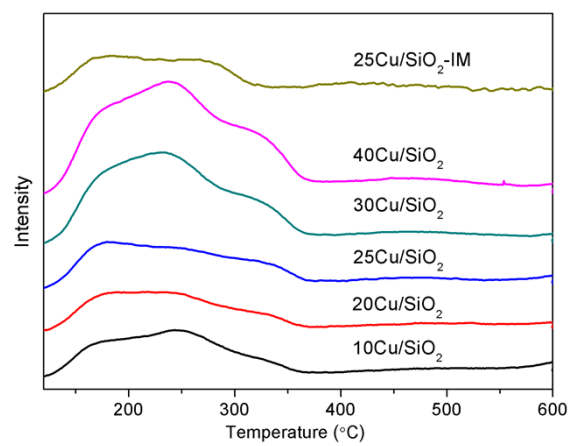

**Fig. S2** NH<sub>3</sub>-TPD profiles of various catalysts.

## Reference

- 1 A. Bienholz, H. Hofmann, P. Claus, *Appl. Catal., A: Gen.* 2011, **391**, 153-157.
- 2 E. S. Vasiliadou, A. A. Lemonidou, *Appl. Catal., A: Gen.* 2011, **396**, 177-185.
- 3 Z. Huang, F. Cui, J. Xue, J. Zuo, J. Chen, C. Xia, *Catal. Today* 2012, **183**, 42-51.
- 4 Z. Huang, F. Cui, H. Kang, J. Chen, X. Zhang, C. Xia, *Chem. Mater.* 2008, **20**, 5090-5099.
- 5 Z. Huang, H. Liu, F. Cui, J. Zuo, J. Chen, C. Xia, *Catal. Today* 2014, **234**, 223-232.
- 6 S. Zhu, X. Gao, Y. Zhu, Y. Zhu, H. Zheng, Y. Li, *J. Catal.* 2013, **303**, 70-79.
